# Supplementary material for: Cohort profile: COVID-19 in a cohort of pregnant women and their descendants, the MOACC-19 study
Source: bioRxiv or medRxiv preprint supplement (doi:10.1101/2020.08.20.20178657), 2021-02-07
Supplement: Supplementary file [file 2020.08.20.20178657-1.pdf]

Supplementary Table 1. Characteristics of women tested positive for SARS-CoV-2 infection via RT-PCR

| <b>Variable</b>                            | <b>Category</b>                                                                    | <b>N (%)</b>       |
|--------------------------------------------|------------------------------------------------------------------------------------|--------------------|
| <b>Study cohort</b>                        | Sub-cohort 1 (Women delivering before 26/May/2020)                                 | 6                  |
|                                            | Sub-cohort 2 (Women delivering from 26/May/2020 on)                                | 1                  |
|                                            | Sub-cohort 3 (Women in their 12 <sup>th</sup> week of pregnancy after 26/May/2020) | 1                  |
| <b>Partner RT-PCR</b>                      | Negative                                                                           | 5                  |
|                                            | Positive                                                                           | 1                  |
|                                            | Missing                                                                            | 2                  |
| <b>Age</b>                                 | <25 years                                                                          | 0                  |
|                                            | 25-29 years                                                                        | 0                  |
|                                            | 30-34 years                                                                        | 3 (37.5)           |
|                                            | 35-39 years                                                                        | 2 (25.0)           |
|                                            | ≥40 years                                                                          | 3 (37.5)           |
| <b>Education level</b>                     | Primary studies                                                                    | 0                  |
|                                            | Secondary studies                                                                  | 1 (12.5)           |
|                                            | FP                                                                                 | 2 (25.0)           |
|                                            | University studies                                                                 | 5 (62.5)           |
| <b>Work status</b>                         | Unemployed / no active worker                                                      | 1 (12.5)           |
|                                            | Employed                                                                           | 7 (87.5)           |
|                                            | Student                                                                            | 0                  |
| <b>Occupation</b>                          | Health care worker                                                                 | 3 (37.5)           |
|                                            | Working in restaurant or commerce                                                  | 3 (37.5)           |
|                                            | Others                                                                             | 2 (25.0)           |
| <b>Fertilization type</b>                  | Natural                                                                            | 7 (87.5)           |
|                                            | Artificial insemination                                                            | 0                  |
|                                            | In vitro fertilization (own ovule)                                                 | 0                  |
|                                            | In vitro fertilization (ovodonation)                                               | 0                  |
|                                            | Missing (still pregnant)                                                           | 1 (12.5)           |
| <b>Smoker in pregnancy</b>                 | No                                                                                 | 8 (100.0)          |
|                                            | Yes                                                                                | 0                  |
| <b>Alcohol consumption in pregnancy</b>    | No                                                                                 | 8 (100.0)          |
|                                            | Yes                                                                                | 0                  |
| <b>Parity</b>                              | 1                                                                                  | 5 (62.5)           |
|                                            | 2                                                                                  | 1 (12.5)           |
|                                            | ≥3                                                                                 | 1 (12.5)           |
|                                            | Missing (still pregnant)                                                           | 1 (12.5)           |
| <b>Type of delivery</b>                    | Eutocic                                                                            | 3 (37.5)           |
|                                            | Caesarean rate                                                                     | 2 (25.5)           |
|                                            | Instrumental                                                                       | 2 (25.5)           |
|                                            | Still pregnant                                                                     | 1 (12.5)           |
| <b>Age (years)</b>                         | mean±sd (min, max)                                                                 | 36.4±4.0 (30 – 40) |
| <b>Gestational age low at work (weeks)</b> | mean±sd (min, max)                                                                 | 21.1±12.7 (0 – 32) |

|                                              |                    |                        |
|----------------------------------------------|--------------------|------------------------|
| <b>Pregestational BMI (kg/m<sup>2</sup>)</b> | mean±sd (min, max) | 22.3±2.9 (18.5 – 28.0) |
| <b>Gestational weight gain (kg)</b>          | mean±sd (min, max) | 10.9±2.8 (8 – 16)      |
| <b>Symptoms associated with COVID-19</b>     | Fever              | 0                      |
|                                              | Chills             | 0                      |
|                                              | Sore throat        | 0                      |
|                                              | Cough              | 0                      |
|                                              | Short of breathing | 1                      |
|                                              | Headache           | 0                      |
|                                              | Nausea             | 1                      |
|                                              | Loss of sense      | 1                      |

Supplementary Table 2. Characteristics of children born from women tested positive to SARS-CoV-2 infection using RT-PCR

| <b>Variable</b>                            | <b>Category</b>                | <b>N = 7 (%)</b>        |
|--------------------------------------------|--------------------------------|-------------------------|
| <b>Gestational age at birth</b>            | <b>&lt;34 weeks</b>            | 0                       |
|                                            | <b>34-36 weeks</b>             | 0                       |
|                                            | <b>≥37 weeks</b>               | 7 (100.0)               |
| <b>Birth weight</b>                        | <b>&lt;2500 g</b>              | 0                       |
|                                            | <b>2500-4000 g</b>             | 7 (100.0)               |
|                                            | <b>&gt;4000 g</b>              | 0                       |
| <b>Gender</b>                              | <b>Women</b>                   | 3 (42.9)                |
|                                            | <b>Men</b>                     | 4 (57.1)                |
| <b>Twin or singleton</b>                   | <b>Singleton</b>               | 7 (100.0)               |
|                                            | <b>Twin</b>                    | 0                       |
| <b>Breastfeeding at hospital discharge</b> | <b>Exclusive breastfeeding</b> | 2 (28.6)                |
|                                            | <b>Mixed</b>                   | 3 (42.9)                |
|                                            | <b>Infant formula</b>          | 2 (28.6)                |
| <b>Neonatology admission</b>               | <b>No</b>                      | 6 (85.7)                |
|                                            | <b>Yes</b>                     | 1 (14.3)                |
| <b>Birth size</b>                          | <b>mean±sd (min, max)</b>      | 49.1±2.4 (47 – 53)      |
| <b>Birth cephalic perimeter</b>            | <b>mean±sd (min, max)</b>      | 34.6±2.0 (33 – 39)      |
| <b>Apgar 1'</b>                            | <b>mean±sd (min, max)</b>      | 8.3±1.9 (4 – 9)         |
| <b>Apgar 5'</b>                            | <b>mean±sd (min, max)</b>      | 9.4±0.8 (8 – 10)        |
| <b>pH at birth</b>                         | <b>mean±sd (min, max)</b>      | 7.27±0.04 (7.23 – 7.32) |
| <b>SARS-CoV-2 via RT-PCR</b>               |                                | All negative            |
